# Supplementary material for: What Are the Effects of Vitamin A Oral Supplementation in the Prevention and Management of Viral Infections? A Systematic Review of Randomized Clinical Trials
Source: MDPI journal article supplement (doi:10.3390/nu14194081), 2022-10-01
Supplement: s1 [file s1]

Table S1. Search strategies used in the systematic review.

|                |                                                                                                                                                                                                                                                                                                                                                                                                                                                                                                                                                  |
|----------------|--------------------------------------------------------------------------------------------------------------------------------------------------------------------------------------------------------------------------------------------------------------------------------------------------------------------------------------------------------------------------------------------------------------------------------------------------------------------------------------------------------------------------------------------------|
| PubMed         | ((("virus diseases"[MeSH Terms] OR ("virus"[All Fields] AND "diseases"[All Fields]) OR "virus diseases"[All Fields] OR ("viral"[All Fields] AND "infection"[All Fields]) OR "viral infection"[All Fields]) OR virus OR viruses) AND ("retinoids"[MeSH Terms] OR "retinoidal"[All Fields] OR "retinoids"[All Fields] OR "retinoid"[All Fields] OR ("vitamin a"[MeSH Terms] OR "vitamin a"[All Fields]) OR ("tretinoin"[MeSH Terms] OR "tretinoin"[All Fields] OR ("retinoic"[All Fields] AND "acid"[All Fields]) OR "retinoic acid"[All Fields])) |
| Scopus         | TITLE-ABS-KEY (( "virus disease" OR ( virus AND disease ) OR ( viral AND infection ) OR "viral infection" ) AND ( retinoidal OR retinoid OR "vitamin a" OR tretinoin OR ( retinoic AND acid ) OR "retinoic acid" ))                                                                                                                                                                                                                                                                                                                              |
| Web Of Science | ((("virus disease" OR ( virus AND disease ) OR ( viral AND infection ) OR "viral infection" OR virus ) AND ( retinoidal OR retinoid OR "vitamin a" OR tretinoin OR ( retinoic AND acid ) OR "retinoic acid" )))                                                                                                                                                                                                                                                                                                                                  |

Table S2. Revised Cochrane risk-of-bias tool for randomized trials (RoB2).

| Author, year        | DOMAIN 1                                            | DOMAIN 2                                                                                              |                                                                                                     | DOMAIN 3             | DOMAIN 4                                   | DOMAIN 5                                         | Overall risk of bias |
|---------------------|-----------------------------------------------------|-------------------------------------------------------------------------------------------------------|-----------------------------------------------------------------------------------------------------|----------------------|--------------------------------------------|--------------------------------------------------|----------------------|
|                     | Risk of bias arising from the randomization process | Risk of bias due to deviations from the intended interventions (effect of assignment to intervention) | Risk of bias due to deviations from the intended interventions (effect of adhering to intervention) | Missing outcome data | Risk of bias in measurement of the outcome | Risk of bias in selection of the reported result |                      |
| Coutsoudis, 1995    | Low                                                 | Some Concerns                                                                                         | Low                                                                                                 | Low                  | Some Concerns                              | Some Concerns                                    | Some Concerns        |
| Coutsoudis, 1997    | Some Concerns                                       | Some Concerns                                                                                         | Some Concerns                                                                                       | Some Concerns        | Low                                        | Low                                              | Some Concerns        |
| Coutsoudis, 1999    | Some Concerns                                       | High                                                                                                  | Some Concerns                                                                                       | Some Concerns        | Low                                        | Low                                              | Some Concerns        |
| Kennedy, 2000       | Some Concerns                                       | Some Concerns                                                                                         | Low                                                                                                 | Low                  | Some Concerns                              | Low                                              | Some Concerns        |
| Kennedy-Oji, 2001   | Some Concerns                                       | Low                                                                                                   | Some Concerns                                                                                       | Low                  | Some Concerns                              | Low                                              | Some Concerns        |
| Semba, 1998         | Some Concerns                                       | Some Concerns                                                                                         | Low                                                                                                 | Low                  | Low                                        | Low                                              | Low                  |
| Humphrey, 1999      | Low                                                 | High                                                                                                  | High                                                                                                | Some Concerns        | Some Concerns                              | Some Concerns                                    | Some Concerns        |
| Baeten, 2002        | Some Concerns                                       | Some Concerns                                                                                         | Some Concerns                                                                                       | Low                  | Low                                        | Some Concerns                                    | Some Concerns        |
| Baeten, 2004        | Some Concerns                                       | Some Concerns                                                                                         | Some Concerns                                                                                       | Some Concerns        | Low                                        | Low                                              | Some Concerns        |
| Villamor, 2002 (a)  | Low                                                 | Low                                                                                                   | Some Concerns                                                                                       | Some Concerns        | Low                                        | Low                                              | Low                  |
| Fawzi, 2004 A       | Some Concerns                                       | Some Concerns                                                                                         | Some Concerns                                                                                       | Low                  | Some Concerns                              | Some Concerns                                    | Low                  |
| Fawzi, 2004 B       | Low                                                 | Low                                                                                                   | Some Concerns                                                                                       | Low                  | Some Concerns                              | Low                                              | Low                  |
| Webb, 2009          | Low                                                 | Low                                                                                                   | Some Concerns                                                                                       | Low                  | Some Concerns                              | Low                                              | Low                  |
| Villamor, 2022 (b)  | Low                                                 | Some Concerns                                                                                         | Some Concerns                                                                                       | Some Concerns        | Some Concerns                              | Low                                              | Some Concerns        |
| Semba, 2005         | Low                                                 | Low                                                                                                   | Some Concerns                                                                                       | Low                  | Low                                        | Some Concerns                                    | Low                  |
| Humphrey, 2006      | Low                                                 | High                                                                                                  | High                                                                                                | High                 | Some Concerns                              | Some Concerns                                    | High                 |
| Zvandasara, 2006    | Some Concerns                                       | Some Concerns                                                                                         | Low                                                                                                 | Some Concerns        | Low                                        | Low                                              | Some Concerns        |
| Long, 2007          | Some Concerns                                       | Some Concerns                                                                                         | Low                                                                                                 | Some Concerns        | Some Concerns                              | Low                                              | Some Concerns        |
| Long, 2011          | Some Concerns                                       | Some Concerns                                                                                         | Low                                                                                                 | Low                  | Low                                        | Low                                              | Some Concerns        |
| Okita, 2014         | Low                                                 | Low                                                                                                   | Low                                                                                                 | Low                  | Low                                        | Low                                              | Low                  |
| Georgala, 2004      | Some Concerns                                       | Some Concerns                                                                                         | Some Concerns                                                                                       | High                 | High                                       | High                                             | High                 |
| Olguin-Garcia, 2014 | Low                                                 | Low                                                                                                   | Some Concerns                                                                                       | Some Concerns        | Some Concerns                              | Some Concerns                                    | Some Concerns        |
| Kaur, 2017          | Some Concerns                                       | High                                                                                                  | High                                                                                                | Some Concerns        | Some Concerns                              | Low                                              | High                 |
| Pinnock, 1988       | Some Concerns                                       | Low                                                                                                   | Low                                                                                                 | Some Concerns        | Some Concerns                              | High                                             | High                 |
| Breese, 1996        | Low                                                 | Low                                                                                                   | Some Concerns                                                                                       | Some Concerns        | Some Concerns                              | Some Concerns                                    | Some Concerns        |
| Dowell, 1996        | Low                                                 | Low                                                                                                   | Some Concerns                                                                                       | Some Concerns        | Some Concerns                              | Low                                              | Some Concerns        |
| Quinlan, 1996       | High                                                | High                                                                                                  | Some Concerns                                                                                       | Some Concerns        | High                                       | Some Concerns                                    | High                 |
| Barclay, 1987       | Low risk                                            | Low risk                                                                                              | Low risk                                                                                            | Low risk             | Low risk                                   | Low risk                                         | Low risk             |
| Hussey, 1990        | Low risk                                            | Low risk                                                                                              | Low risk                                                                                            | Low risk             | Low risk                                   | Low risk                                         | Low risk             |
| Rahmathullah, 1990  | Some concerns                                       | Low risk                                                                                              | Low risk                                                                                            | Low risk             | Low risk                                   | Low risk                                         | Low risk             |

|                  |               |               |               |               |               |               |               |
|------------------|---------------|---------------|---------------|---------------|---------------|---------------|---------------|
| Coutsoudis, 1991 | Low risk      |
| Coutsoudis, 1992 | Low risk      |
| Ogaro, 1993      | Some concerns | Low risk      | Low risk      | Low risk      | Some concerns | Low risk      | Some concerns |
| Agarwal, 1995    | Some concerns | High risk     |
| Rosales, 1996    | Low risk      | Low risk      | Low risk      | Some concerns | Some concerns | Some concerns | Some concerns |
| Rosales, 2002    | Low risk      | Low risk      | Low risk      | Some concerns | Some concerns | Some concerns | Some concerns |
| Dollimore, 1997  | Low risk      | Some concerns | Some concerns | Low risk      | Low risk      | Low risk      | Low risk      |
| Benn, 2008       | Some concerns | Low risk      | Some concerns |
| Diness, 2011     | Some concerns | Low risk      | Low risk      | Low risk      | Low risk      | Some concerns | Some concerns |
| Agawashi, 2013   | Low risk      | Some concerns | Some concerns | Low risk      | Low risk      | Low risk      | Some concerns |

---
